# Supplementary material for: Comparative cradle-to-gate life cycle assessment of hydrothermal zinc oxide nanowire synthesis methods
Source: Royal Society of Chemistry journal article supplement (doi:10.1039/d5gc03866a), 2026-01-01
Supplement: d5gc03866a1.xlsx [file d5gc03866a1.xlsx]

## Sheet: Comparative LCA (base scenario)
Impact categories	Unit	Fehling Fr	Solgel Fr
Acidification	mol H+-Eq	0.00269	0.00459
Climate change	kg CO2-Eq	0.66704	1.18605
Climate change: biogenic	kg CO2-Eq	0.00198	0.00241
Climate change: fossil	kg CO2-Eq	0.66445	1.18278
Climate change: land use and land use change	kg CO2-Eq	0.00061	0.00087
Ecotoxicity: freshwater	CTUe	6.28056	11.7766
Ecotoxicity: freshwater, inorganics	CTUe	4.39464	10.1858
Ecotoxicity: freshwater, organics	CTUe	1.88592	1.59083
Energy resources: non-renewable	MJ, net calorific value	22.8411	54.6441
Eutrophication: freshwater	kg P-Eq	0.00028	0.00046
Eutrophication: marine	kg N-Eq	0.00063	0.00101
Eutrophication: terrestrial	mol N-Eq	0.006	0.00928
Human toxicity: carcinogenic	CTUh	3.65462e-09	4.80253e-09
Human toxicity: carcinogenic, inorganics	CTUh	1.69326e-10	4.19896e-10
Human toxicity: carcinogenic, organics	CTUh	3.48529e-09	4.38263e-09
Human toxicity: non-carcinogenic	CTUh	8.53058e-09	1.93454e-08
Human toxicity: non-carcinogenic, inorganics	CTUh	8.01718e-09	1.82942e-08
Human toxicity: non-carcinogenic, organics	CTUh	5.13403e-10	1.05113e-09
Ionising radiation: human health	kBq U235-Eq	0.79945	2.19476
Land use	dimensionless	2.16908	4.23177
Material resources: metals/minerals	kg Sb-Eq	7.57365e-06	1.96309e-05
Ozone depletion	kg CFC-11-Eq	1.50363e-08	2.55584e-08
Particulate matter formation	disease incidence	2.52312e-08	4.31157e-08
Photochemical oxidant formation: human health	kg NMVOC-Eq	0.002	0.00311
Water use	m3 world Eq deprived	1.79312	2.17727

## Sheet: Sens. Analy. - Wafer
Impact categories	Unit	Fehling Fr	Fehling No Wafer Fr
Acidification	mol H+-Eq	0.00269	0.00131
Climate change	kg CO2-Eq	0.66704	0.29734
Climate change: biogenic	kg CO2-Eq	0.00198	0.00035
Climate change: fossil	kg CO2-Eq	0.66445	0.29681
Climate change: land use and land use change	kg CO2-Eq	0.00061	0.00018
Ecotoxicity: freshwater	CTUe	6.28056	3.32993
Ecotoxicity: freshwater, inorganics	CTUe	4.39464	2.88751
Ecotoxicity: freshwater, organics	CTUe	1.88592	0.44242
Energy resources: non-renewable	MJ, net calorific value	22.8411	22.1777
Eutrophication: freshwater	kg P-Eq	0.00028	0.00011
Eutrophication: marine	kg N-Eq	0.00063	0.00026
Eutrophication: terrestrial	mol N-Eq	0.006	0.00221
Human toxicity: carcinogenic	CTUh	3.65462e-09	1.12179e-09
Human toxicity: carcinogenic, inorganics	CTUh	1.69326e-10	1.35406e-10
Human toxicity: carcinogenic, organics	CTUh	3.48529e-09	9.86383e-10
Human toxicity: non-carcinogenic	CTUh	8.53058e-09	7.49117e-09
Human toxicity: non-carcinogenic, inorganics	CTUh	8.01718e-09	7.07706e-09
Human toxicity: non-carcinogenic, organics	CTUh	5.13403e-10	4.14106e-10
Ionising radiation: human health	kBq U235-Eq	0.79945	0.96799
Land use	dimensionless	2.16908	1.42246
Material resources: metals/minerals	kg Sb-Eq	7.57365e-06	8.43613e-06
Ozone depletion	kg CFC-11-Eq	1.50363e-08	7.1591e-09
Particulate matter formation	disease incidence	2.52312e-08	1.23151e-08
Photochemical oxidant formation: human health	kg NMVOC-Eq	0.002	0.00079
Water use	m3 world Eq deprived	1.79312	0.28088

## Sheet: Sens. Analy - Anneal Time
Impact categories	Unit	Solgel Fr	Solgel Low e Fr
Acidification	mol H+-Eq	0.00459	0.00408
Climate change	kg CO2-Eq	1.18605	1.11264
Climate change: biogenic	kg CO2-Eq	0.00241	0.00228
Climate change: fossil	kg CO2-Eq	1.18278	1.10957
Climate change: land use and land use change	kg CO2-Eq	0.00087	0.0008
Ecotoxicity: freshwater	CTUe	11.7766	11.1621
Ecotoxicity: freshwater, inorganics	CTUe	10.1858	9.75146
Ecotoxicity: freshwater, organics	CTUe	1.59083	1.41062
Energy resources: non-renewable	MJ, net calorific value	54.6441	45.1524
Eutrophication: freshwater	kg P-Eq	0.00046	0.00043
Eutrophication: marine	kg N-Eq	0.00101	0.00092
Eutrophication: terrestrial	mol N-Eq	0.00928	0.00847
Human toxicity: carcinogenic	CTUh	4.80253e-09	4.42433e-09
Human toxicity: carcinogenic, inorganics	CTUh	4.19896e-10	3.87376e-10
Human toxicity: carcinogenic, organics	CTUh	4.38263e-09	4.03696e-09
Human toxicity: non-carcinogenic	CTUh	1.93454e-08	1.62322e-08
Human toxicity: non-carcinogenic, inorganics	CTUh	1.82942e-08	1.53528e-08
Human toxicity: non-carcinogenic, organics	CTUh	1.05113e-09	8.79417e-10
Ionising radiation: human health	kBq U235-Eq	2.19476	1.76953
Land use	dimensionless	4.23177	3.65855
Material resources: metals/minerals	kg Sb-Eq	1.96309e-05	1.61157e-05
Ozone depletion	kg CFC-11-Eq	2.55584e-08	2.29712e-08
Particulate matter formation	disease incidence	4.31157e-08	3.84611e-08
Photochemical oxidant formation: human health	kg NMVOC-Eq	0.00311	0.00283
Water use	m3 world Eq deprived	2.17727	2.05711

## Sheet: Sens. Analy - Regionalization
Impact categories	Unit	Fehing CN	Fehling Fr	Fehling TW	Fehling USA
Acidification	mol H+-Eq	0.01174	0.00269	0.00648	0.00393
Climate change	kg CO2-Eq	2.28943	0.66704	1.68166	1.26094
Climate change: biogenic	kg CO2-Eq	0.00197	0.00198	0.002	0.00191
Climate change: fossil	kg CO2-Eq	2.2867	0.66445	1.67824	1.25845
Climate change: land use and land use change	kg CO2-Eq	0.00076	0.00061	0.00141	0.00058
Ecotoxicity: freshwater	CTUe	10.6908	6.28056	8.47612	7.52384
Ecotoxicity: freshwater, inorganics	CTUe	8.62169	4.39464	6.44788	5.5067
Ecotoxicity: freshwater, organics	CTUe	2.06915	1.88592	2.02824	2.01714
Energy resources: non-renewable	MJ, net calorific value	22.1494	22.8411	22.1885	17.9466
Eutrophication: freshwater	kg P-Eq	0.00057	0.00028	0.00106	0.00079
Eutrophication: marine	kg N-Eq	0.00245	0.00063	0.00138	0.00084
Eutrophication: terrestrial	mol N-Eq	0.02582	0.006	0.01291	0.00761
Human toxicity: carcinogenic	CTUh	4.40773e-09	3.65462e-09	4.27489e-09	4.19681e-09
Human toxicity: carcinogenic, inorganics	CTUh	2.4776e-10	1.69326e-10	2.49715e-10	2.14197e-10
Human toxicity: carcinogenic, organics	CTUh	4.15997e-09	3.48529e-09	4.02517e-09	3.98261e-09
Human toxicity: non-carcinogenic	CTUh	1.62866e-08	8.53058e-09	1.36208e-08	1.11518e-08
Human toxicity: non-carcinogenic, inorganics	CTUh	1.53625e-08	8.01718e-09	1.29856e-08	1.05781e-08
Human toxicity: non-carcinogenic, organics	CTUh	9.24146e-10	5.13403e-10	6.35188e-10	5.73717e-10
Ionising radiation: human health	kBq U235-Eq	0.07621	0.79945	0.24692	0.19356
Land use	dimensionless	5.00435	2.16908	2.30363	2.26666
Material resources: metals/minerals	kg Sb-Eq	7.36553e-06	7.57365e-06	7.55957e-06	7.36055e-06
Ozone depletion	kg CFC-11-Eq	1.49878e-08	1.50363e-08	2.76756e-08	1.65355e-08
Particulate matter formation	disease incidence	1.48355e-07	2.52312e-08	3.21143e-08	2.87929e-08
Photochemical oxidant formation: human health	kg NMVOC-Eq	0.00714	0.002	0.00415	0.00288
Water use	m3 world Eq deprived	1.78103	1.79312	1.70739	1.67822
