# Supplementary material for: Comparative cradle-to-gate life cycle assessment of hydrothermal zinc oxide nanowire synthesis methods
Source: Royal Society of Chemistry journal article supplement (doi:10.1039/d5gc03866a), 2026-01-01
Supplement: d5gc03866a2.xlsx [file d5gc03866a2.xlsx]

## Sheet: Acidification
Contribution [%]	Process	Required amount	Unit	Total result [mol H+-Eq]	Direct contribution [mol H+-Eq]
100	ZnO NW - Solgel - FR	2e-06	kg	0.00458741	0
55.8	market for electricity, low voltage | electricity, low voltage | Cutoff, S - FR	15.1094	MJ	0.00255868	0.00255868
31.8	market for single-Si wafer, for electronics | single-Si wafer, for electronics | Cutoff, U - GLO	0.0008867	m2	0.00145889	0
12.2	market for hazardous waste, for incineration | hazardous waste, for incineration | Cutoff, S - Europe without Switzerland	0.197044	kg	0.000557994	0.000557994
0.13	growth solution - FR	0.000197044	m3	6.13282e-06	0
0.12	Seed Layer Fabrication - FR	2.95567e-07	m3	5.70764e-06	0

## Sheet: Climate Change
Contribution [%]	Process	Required amount	Unit	Total result [kg CO2-Eq]	Direct contribution [kg CO2-Eq]
100	ZnO NW - Solgel - FR	2e-06	kg	1.20385	0
40.6	market for hazardous waste, for incineration | hazardous waste, for incineration | Cutoff, S - Europe without Switzerland	0.2	kg	0.488522	0.488522
31	market for electricity, low voltage | electricity, low voltage | Cutoff, S - FR	15.336	MJ	0.373433	0.373433
28.2	market for single-Si wafer, for electronics | single-Si wafer, for electronics | Cutoff, U - GLO	0.0009	m2	0.338896	0
0.13	growth solution - FR	0.0002	m3	0.00160648	0
0.12	Seed Layer Fabrication - FR	3e-07	m3	0.0013878	0

## Sheet: Ecotoxicity freshwater
Contribution [%]	Process	Required amount	Unit	Total result [CTUe]	Direct contribution [CTUe]
100	ZnO NW - Solgel - FR	2e-06	kg	11.9533	0
60.6	market for hazardous waste, for incineration | hazardous waste, for incineration | Cutoff, S - Europe without Switzerland	0.2	kg	7.23791	7.23791
26.2	market for electricity, low voltage | electricity, low voltage | Cutoff, S - FR	15.336	MJ	3.12623	3.12623
13.1	market for single-Si wafer, for electronics | single-Si wafer, for electronics | Cutoff, U - GLO	0.0009	m2	1.56612	0
0.12	growth solution - FR	0.0002	m3	0.0138619	0
0.0767	Seed Layer Fabrication - FR	3e-07	m3	0.00917004	0

## Sheet: Energy Resources, non-renew
Contribution [%]	Process	Required amount	Unit	Total result [MJ, net calorific value]	Direct contribution [MJ, net calorific value]
100	ZnO NW - Solgel - FR	2e-06	kg	55.4638	0
87.1	market for electricity, low voltage | electricity, low voltage | Cutoff, S - FR	15.336	MJ	48.2836	48.2836
8.53	market for single-Si wafer, for electronics | single-Si wafer, for electronics | Cutoff, U - GLO	0.0009	m2	4.73217	0
4.3	market for hazardous waste, for incineration | hazardous waste, for incineration | Cutoff, S - Europe without Switzerland	0.2	kg	2.3875	2.3875
0.0603	growth solution - FR	0.0002	m3	0.0334613	0
0.0488	Seed Layer Fabrication - FR	3e-07	m3	0.0270903	0

## Sheet: Eutroph Freshwater
Contribution [%]	Process	Required amount	Unit	Total result [kg P-Eq]	Direct contribution [kg P-Eq]
100	ZnO NW - Solgel - FR	2e-06	kg	0.000465874	0
36.5	market for single-Si wafer, for electronics | single-Si wafer, for electronics | Cutoff, U - GLO	0.0009	m2	0.000170236	0
33.4	market for electricity, low voltage | electricity, low voltage | Cutoff, S - FR	15.336	MJ	0.000155688	0.000155688
29.9	market for hazardous waste, for incineration | hazardous waste, for incineration | Cutoff, S - Europe without Switzerland	0.2	kg	0.000139331	0.000139331
0.0902	Seed Layer Fabrication - FR	3e-07	m3	4.20091e-07	0
0.0427	growth solution - FR	0.0002	m3	1.98819e-07	0

## Sheet: Eutroph marine
Contribution [%]	Process	Required amount	Unit	Total result [kg N-Eq]	Direct contribution [kg N-Eq]
100	ZnO NW - Solgel - FR	2e-06	kg	0.00102947	0
48	market for electricity, low voltage | electricity, low voltage | Cutoff, S - FR	15.336	MJ	0.000494536	0.000494536
37.7	market for single-Si wafer, for electronics | single-Si wafer, for electronics | Cutoff, U - GLO	0.0009	m2	0.000387704	0
14.1	market for hazardous waste, for incineration | hazardous waste, for incineration | Cutoff, S - Europe without Switzerland	0.2	kg	0.000145058	0.000145058
0.12	Seed Layer Fabrication - FR	3e-07	m3	1.23717e-06	0
0.0906	growth solution - FR	0.0002	m3	9.32328e-07	0

## Sheet: Eutroph Terr
Contribution [%]	Process	Required amount	Unit	Total result [mol N-Eq]	Direct contribution [mol N-Eq]
100	ZnO NW - Solgel - FR	2e-06	kg	0.0094148	0
43.6	market for electricity, low voltage | electricity, low voltage | Cutoff, S - FR	15.336	MJ	0.00410629	0.00410629
41.2	market for single-Si wafer, for electronics | single-Si wafer, for electronics | Cutoff, U - GLO	0.0009	m2	0.0038814	0
14.8	market for hazardous waste, for incineration | hazardous waste, for incineration | Cutoff, S - Europe without Switzerland	0.2	kg	0.00139688	0.00139688
0.2	growth solution - FR	0.0002	m3	1.90072e-05	0
0.12	Seed Layer Fabrication - FR	3e-07	m3	1.12312e-05	0

## Sheet: Human tox car
Contribution [%]	Process	Required amount	Unit	Total result [CTUh]	Direct contribution [CTUh]
100	ZnO NW - Solgel - FR	2e-06	kg	4.87457e-09	0
40.3	market for single-Si wafer, for electronics | single-Si wafer, for electronics | Cutoff, U - GLO	0.0009	m2	1.96222e-09	0
39.5	market for electricity, low voltage | electricity, low voltage | Cutoff, S - FR	15.336	MJ	1.92386e-09	1.92386e-09
20.1	market for hazardous waste, for incineration | hazardous waste, for incineration | Cutoff, S - Europe without Switzerland	0.2	kg	9.79654e-10	9.79654e-10
0.11	growth solution - FR	0.0002	m3	5.39738e-12	0
0.0704	Seed Layer Fabrication - FR	3e-07	m3	3.43195e-12	0

## Sheet: Human tox non car
Contribution [%]	Process	Required amount	Unit	Total result [CTUh]	Direct contribution [CTUh]
100	ZnO NW - Solgel - FR	2e-06	kg	1.96355e-08	0
80.7	market for electricity, low voltage | electricity, low voltage | Cutoff, S - FR	15.336	MJ	1.58365e-08	1.58365e-08
11.2	market for single-Si wafer, for electronics | single-Si wafer, for electronics | Cutoff, U - GLO	0.0009	m2	2.19922e-09	0
8.01	market for hazardous waste, for incineration | hazardous waste, for incineration | Cutoff, S - Europe without Switzerland	0.2	kg	1.57227e-09	1.57227e-09
0.0798	growth solution - FR	0.0002	m3	1.56644e-11	0
0.0603	Seed Layer Fabrication - FR	3e-07	m3	1.18325e-11	0

## Sheet: Ionizing Radiation
Contribution [%]	Process	Required amount	Unit	Total result [kBq U235-Eq]	Direct contribution [kBq U235-Eq]
100	ZnO NW - Solgel - FR	2e-06	kg	2.22768	0
97.1	market for electricity, low voltage | electricity, low voltage | Cutoff, S - FR	15.336	MJ	2.1631	2.1631
2.36	market for single-Si wafer, for electronics | single-Si wafer, for electronics | Cutoff, U - GLO	0.0009	m2	0.0524755	0
0.54	market for hazardous waste, for incineration | hazardous waste, for incineration | Cutoff, S - Europe without Switzerland	0.2	kg	0.0119579	0.0119579
0.00357	Seed Layer Fabrication - FR	3e-07	m3	7.94372e-05	0
0.00297	growth solution - FR	0.0002	m3	6.60596e-05	0

[truncated: 6 more sheets: Land Use, Material Resources, Ozone Depletion, Particulate Matter Form, Photochemical, Water Use]
