# Supplementary material for: Comparative cradle-to-gate life cycle assessment of hydrothermal zinc oxide nanowire synthesis methods
Source: Royal Society of Chemistry journal article supplement (doi:10.1039/d5gc03866a), 2026-01-01
Supplement: d5gc03866a3.xlsx [file d5gc03866a3.xlsx]

## Sheet: Acidification
Contribution [%]	Process	Required amount	Unit	Total result [mol H+-Eq]	Direct contribution [mol H+-Eq]
100	ZnO NW - Fehling - FR	2e-06	kg	0.00268522	0
55.1	market for single-Si wafer, for electronics | single-Si wafer, for electronics | Cutoff, U - GLO	0.0009	m2	0.00148078	0
33.1	market for electricity, low voltage | electricity, low voltage | Cutoff, S - FR	5.256	MJ	0.000890072	0.000890072
7.27	market for hazardous waste, for incineration | hazardous waste, for incineration | Cutoff, S - Europe without Switzerland	0.06891	kg	0.000195141	0.000195141
3.79	market for acetone, liquid | acetone, liquid | Cutoff, S - RER	0.01558	kg	0.000101647	0.000101647
0.53	market for o-dichlorobenzene | o-dichlorobenzene | Cutoff, S - RoW	0.001	kg	1.41093e-05	1.41093e-05
0.11	market for cellulose fibre | cellulose fibre | Cutoff, U - RoW	0.00133	kg	3.07919e-06	0
0.00805	fehling B solution production - FR	1.33333e-05	m3	2.16051e-07	0
0.0043	glucose production v3 - FR	2.66666e-05	m3	1.15435e-07	0
0.00236	fehling A solution production - FR	1.33333e-05	m3	6.32533e-08	0

## Sheet: Climate Change
Contribution [%]	Process	Required amount	Unit	Total result [kg CO2-Eq]	Direct contribution [kg CO2-Eq]
100	ZnO NW - Fehling - FR	2e-06	kg	0.667043	0
50.8	market for single-Si wafer, for electronics | single-Si wafer, for electronics | Cutoff, U - GLO	0.0009	m2	0.338896	0
25.2	market for hazardous waste, for incineration | hazardous waste, for incineration | Cutoff, S - Europe without Switzerland	0.06891	kg	0.16832	0.16832
19.2	market for electricity, low voltage | electricity, low voltage | Cutoff, S - FR	5.256	MJ	0.127984	0.127984
4.26	market for acetone, liquid | acetone, liquid | Cutoff, S - RER	0.01558	kg	0.0284198	0.0284198
0.44	market for o-dichlorobenzene | o-dichlorobenzene | Cutoff, S - RoW	0.001	kg	0.00290567	0.00290567
0.0684	market for cellulose fibre | cellulose fibre | Cutoff, U - RoW	0.00133	kg	0.00045653	0
0.00644	fehling B solution production - FR	1.33333e-05	m3	4.29375e-05	0
0.00163	glucose production v3 - FR	2.66666e-05	m3	1.08801e-05	0
0.000931	fehling A solution production - FR	1.33333e-05	m3	6.20836e-06	0

## Sheet: Ecotoxicity freshwater
Contribution [%]	Process	Required amount	Unit	Total result [CTUe]	Direct contribution [CTUe]
100	ZnO NW - Fehling - FR	2e-06	kg	6.28056	0
39.7	market for hazardous waste, for incineration | hazardous waste, for incineration | Cutoff, S - Europe without Switzerland	0.06891	kg	2.49382	2.49382
24.9	market for single-Si wafer, for electronics | single-Si wafer, for electronics | Cutoff, U - GLO	0.0009	m2	1.56612	0
17.1	market for electricity, low voltage | electricity, low voltage | Cutoff, S - FR	5.256	MJ	1.07143	1.07143
12.4	market for o-dichlorobenzene | o-dichlorobenzene | Cutoff, S - RoW	0.001	kg	0.78075	0.78075
5.78	market for acetone, liquid | acetone, liquid | Cutoff, S - RER	0.01558	kg	0.362825	0.362825
0.0392	market for cellulose fibre | cellulose fibre | Cutoff, U - RoW	0.00133	kg	0.00246035	0
0.0218	glucose production v3 - FR	2.66666e-05	m3	0.00136792	0
0.0175	fehling B solution production - FR	1.33333e-05	m3	0.00110026	0
0.0109	fehling A solution production - FR	1.33333e-05	m3	0.000685986	0

## Sheet: Energy Resources, non-renew
Contribution [%]	Process	Required amount	Unit	Total result [MJ, net calorific value]	Direct contribution [MJ, net calorific value]
100	ZnO NW - Fehling - FR	2e-06	kg	22.8411	0
72.4	market for electricity, low voltage | electricity, low voltage | Cutoff, S - FR	5.256	MJ	16.5479	16.5479
20.7	market for single-Si wafer, for electronics | single-Si wafer, for electronics | Cutoff, U - GLO	0.0009	m2	4.73217	0
3.6	market for hazardous waste, for incineration | hazardous waste, for incineration | Cutoff, S - Europe without Switzerland	0.06891	kg	0.822613	0.822613
2.93	market for acetone, liquid | acetone, liquid | Cutoff, S - RER	0.01558	kg	0.668328	0.668328
0.28	market for o-dichlorobenzene | o-dichlorobenzene | Cutoff, S - RoW	0.001	kg	0.0638946	0.0638946
0.023	market for cellulose fibre | cellulose fibre | Cutoff, U - RoW	0.00133	kg	0.00525449	0
0.00309	fehling B solution production - FR	1.33333e-05	m3	0.000706471	0
0.000618	glucose production v3 - FR	2.66666e-05	m3	0.000141045	0
0.000352	fehling A solution production - FR	1.33333e-05	m3	8.04408e-05	0

## Sheet: Eutroph Freshwater
Contribution [%]	Process	Required amount	Unit	Total result [kg P-Eq]	Direct contribution [kg P-Eq]
100	ZnO NW - Fehling - FR	2e-06	kg	0.000278379	0
61.2	market for single-Si wafer, for electronics | single-Si wafer, for electronics | Cutoff, U - GLO	0.0009	m2	0.000170236	0
19.2	market for electricity, low voltage | electricity, low voltage | Cutoff, S - FR	5.256	MJ	5.33579e-05	5.33579e-05
17.2	market for hazardous waste, for incineration | hazardous waste, for incineration | Cutoff, S - Europe without Switzerland	0.06891	kg	4.80064e-05	4.80064e-05
2.06	market for acetone, liquid | acetone, liquid | Cutoff, S - RER	0.01558	kg	5.72994e-06	5.72994e-06
0.32	market for o-dichlorobenzene | o-dichlorobenzene | Cutoff, S - RoW	0.001	kg	8.85748e-07	8.85748e-07
0.047	market for cellulose fibre | cellulose fibre | Cutoff, U - RoW	0.00133	kg	1.30846e-07	0
0.00897	fehling B solution production - FR	1.33333e-05	m3	2.49746e-08	0
0.0015	glucose production v3 - FR	2.66666e-05	m3	4.17354e-09	0
0.00079	fehling A solution production - FR	1.33333e-05	m3	2.19956e-09	0

## Sheet: Eutroph marine
Contribution [%]	Process	Required amount	Unit	Total result [kg N-Eq]	Direct contribution [kg N-Eq]
100	ZnO NW - Fehling - FR	2e-06	kg	0.000628805	0
61.7	market for single-Si wafer, for electronics | single-Si wafer, for electronics | Cutoff, U - GLO	0.0009	m2	0.000387704	0
27	market for electricity, low voltage | electricity, low voltage | Cutoff, S - FR	5.256	MJ	0.000169489	0.000169489
7.95	market for hazardous waste, for incineration | hazardous waste, for incineration | Cutoff, S - Europe without Switzerland	0.06891	kg	4.99797e-05	4.99797e-05
2.91	market for acetone, liquid | acetone, liquid | Cutoff, S - RER	0.01558	kg	1.82723e-05	1.82723e-05
0.42	market for o-dichlorobenzene | o-dichlorobenzene | Cutoff, S - RoW	0.001	kg	2.6282e-06	2.6282e-06
0.11	market for cellulose fibre | cellulose fibre | Cutoff, U - RoW	0.00133	kg	6.79398e-07	0
0.00602	fehling B solution production - FR	1.33333e-05	m3	3.78466e-08	0
0.00144	glucose production v3 - FR	2.66666e-05	m3	9.05364e-09	0
0.000812	fehling A solution production - FR	1.33333e-05	m3	5.1054e-09	0

## Sheet: Eutroph Terr
Contribution [%]	Process	Required amount	Unit	Total result [mol N-Eq]	Direct contribution [mol N-Eq]
100	ZnO NW - Fehling - FR	2e-06	kg	0.00599723	0
64.7	market for single-Si wafer, for electronics | single-Si wafer, for electronics | Cutoff, U - GLO	0.0009	m2	0.0038814	0
23.5	market for electricity, low voltage | electricity, low voltage | Cutoff, S - FR	5.256	MJ	0.00140732	0.00140732
8.03	market for hazardous waste, for incineration | hazardous waste, for incineration | Cutoff, S - Europe without Switzerland	0.06891	kg	0.000481293	0.000481293
3.21	market for acetone, liquid | acetone, liquid | Cutoff, S - RER	0.01558	kg	0.000192602	0.000192602
0.45	market for o-dichlorobenzene | o-dichlorobenzene | Cutoff, S - RoW	0.001	kg	2.71784e-05	2.71784e-05
0.12	market for cellulose fibre | cellulose fibre | Cutoff, U - RoW	0.00133	kg	6.93303e-06	0
0.00582	fehling B solution production - FR	1.33333e-05	m3	3.48861e-07	0
0.0015	glucose production v3 - FR	2.66666e-05	m3	9.0215e-08	0
0.0011	fehling A solution production - FR	1.33333e-05	m3	6.60136e-08	0

## Sheet: Human tox car
Contribution [%]	Process	Required amount	Unit	Total result [CTUh]	Direct contribution [CTUh]
100	ZnO NW - Fehling - FR	2e-06	kg	3.65462e-09	0
53.7	market for single-Si wafer, for electronics | single-Si wafer, for electronics | Cutoff, U - GLO	0.0009	m2	1.96222e-09	0
18	market for electricity, low voltage | electricity, low voltage | Cutoff, S - FR	5.256	MJ	6.59353e-10	6.59353e-10
15.2	market for acetone, liquid | acetone, liquid | Cutoff, S - RER	0.01558	kg	5.54471e-10	5.54471e-10
9.24	market for hazardous waste, for incineration | hazardous waste, for incineration | Cutoff, S - Europe without Switzerland	0.06891	kg	3.3754e-10	3.3754e-10
3.79	market for o-dichlorobenzene | o-dichlorobenzene | Cutoff, S - RoW	0.001	kg	1.38535e-10	1.38535e-10
0.0523	market for cellulose fibre | cellulose fibre | Cutoff, U - RoW	0.00133	kg	1.91123e-12	0
0.0128	fehling B solution production - FR	1.33333e-05	m3	4.69432e-13	0
0.00218	glucose production v3 - FR	2.66666e-05	m3	7.96522e-14	0
0.00115	fehling A solution production - FR	1.33333e-05	m3	4.19415e-14	0

## Sheet: Human tox non car
Contribution [%]	Process	Required amount	Unit	Total result [CTUh]	Direct contribution [CTUh]
100	ZnO NW - Fehling - FR	2e-06	kg	8.53058e-09	0
63.6	market for electricity, low voltage | electricity, low voltage | Cutoff, S - FR	5.256	MJ	5.42755e-09	5.42755e-09
25.8	market for single-Si wafer, for electronics | single-Si wafer, for electronics | Cutoff, U - GLO	0.0009	m2	2.19922e-09	0
6.35	market for hazardous waste, for incineration | hazardous waste, for incineration | Cutoff, S - Europe without Switzerland	0.06891	kg	5.41727e-10	5.41727e-10
3.08	market for acetone, liquid | acetone, liquid | Cutoff, S - RER	0.01558	kg	2.62438e-10	2.62438e-10
1.07	market for o-dichlorobenzene | o-dichlorobenzene | Cutoff, S - RoW	0.001	kg	9.09659e-11	9.09659e-11
0.092	market for cellulose fibre | cellulose fibre | Cutoff, U - RoW	0.00133	kg	7.84932e-12	0
0.00667	fehling B solution production - FR	1.33333e-05	m3	5.68789e-13	0
0.00193	glucose production v3 - FR	2.66666e-05	m3	1.64479e-13	0
0.00113	fehling A solution production - FR	1.33333e-05	m3	9.66498e-14	0

## Sheet: Ionizing Radiation
Contribution [%]	Process	Required amount	Unit	Total result [kBq U235-Eq]	Direct contribution [kBq U235-Eq]
100	ZnO NW - Fehling - FR	2e-06	kg	0.799451	0
92.7	market for electricity, low voltage | electricity, low voltage | Cutoff, S - FR	5.256	MJ	0.741344	0.741344
6.56	market for single-Si wafer, for electronics | single-Si wafer, for electronics | Cutoff, U - GLO	0.0009	m2	0.0524755	0
0.52	market for hazardous waste, for incineration | hazardous waste, for incineration | Cutoff, S - Europe without Switzerland	0.06891	kg	0.00412011	0.00412011
0.17	market for acetone, liquid | acetone, liquid | Cutoff, S - RER	0.01558	kg	0.00132219	0.00132219
0.019	market for o-dichlorobenzene | o-dichlorobenzene | Cutoff, S - RoW	0.001	kg	0.000152093	0.000152093
0.00321	market for cellulose fibre | cellulose fibre | Cutoff, U - RoW	0.00133	kg	2.56772e-05	0
0.00116	fehling B solution production - FR	1.33333e-05	m3	9.2767e-06	0
0.000167	glucose production v3 - FR	2.66666e-05	m3	1.33308e-06	0
8.7e-05	fehling A solution production - FR	1.33333e-05	m3	6.95554e-07	0

[truncated: 6 more sheets: Land Use, Material Resources, Ozone Depletion, Particulate Matter Form, Photochemical, Water Use]
