# Supplementary material for: Comparative cradle-to-gate life cycle assessment of hydrothermal zinc oxide nanowire synthesis methods
Source: Royal Society of Chemistry journal article supplement (doi:10.1039/d5gc03866a), 2026-01-01
Supplement: d5gc03866a6.pdf [file d5gc03866a6.pdf]

## SUPPLEMENTARY INFORMATION

### **Supplementary Data**

Supplementary Data 1: Raw data from Comparative LCAs (comparative LCA of base scenario, sensitivity analysis of removing silicon wafer, sensitivity analysis of seed layer anneal time, sensitivity analysis of regionalization)

Supplementary Data 2: Contribution analysis raw data – Sol-gel/CBD route

Supplementary Data 3: Contribution analysis raw data – Fehling In-solution route

Supplementary Data 4: Monte Carlo analysis raw data – Sol-gel/CBD route

Supplementary Data 5: Monte Carlo analysis raw data – Fehling In-solution route
