# Supplementary material for: Comparative cradle-to-gate life cycle assessment of hydrothermal zinc oxide nanowire synthesis methods
Source: Royal Society of Chemistry journal article supplement (doi:10.1039/d5gc03866a), 2026-01-01
Supplement: d5gc03866a7.pdf [file d5gc03866a7.pdf]

SUPPLEMENTARY INFORMATION

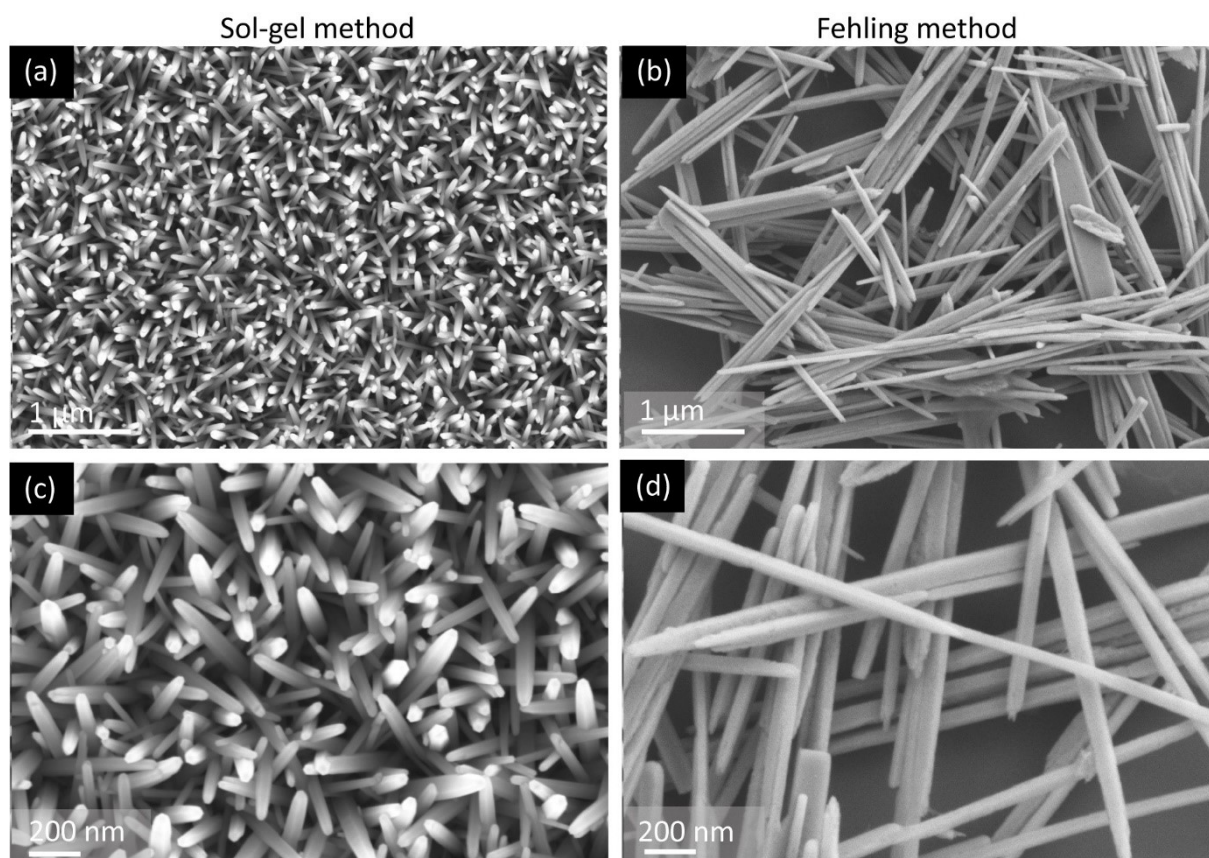

Figure S1: SEM images of ZnO nanowires synthesized by the sol-gel/CBD method (a, c) and the in-solution method inspired by Fehling's reaction (b, d).
