# Supplementary material for: Comparative cradle-to-gate life cycle assessment of hydrothermal zinc oxide nanowire synthesis methods
Source: Royal Society of Chemistry journal article supplement (doi:10.1039/d5gc03866a), 2026-01-01
Supplement: d5gc03866a8.pdf [file d5gc03866a8.pdf]

## SUPPLEMENTARY INFORMATION

Table S1: Breakdown of chemical precursors used in the ZnO NW synthesis process that were not found in the Ecolnvent Database into their base chemicals.

| Input Flow                                                     | Amount        | Unit     | Provider                                                                                                                                              |
|----------------------------------------------------------------|---------------|----------|-------------------------------------------------------------------------------------------------------------------------------------------------------|
| <b>Zinc Nitrate Hexahydrate</b>                                | <b>297.5</b>  | <b>g</b> |                                                                                                                                                       |
| <i>nitric acid, without water, in 50% solution state</i>       | <i>126.0</i>  | <i>g</i> | <i>market for nitric acid, without water, in 50% solution state   nitric acid, without water, in 50% solution state   Cutoff, S - RER w/o RU</i>      |
| <i>water, deionised</i>                                        | <i>90.11</i>  | <i>g</i> | <i>market for water, deionised   water, deionised   Cutoff, S - Europe without Switzerland</i>                                                        |
| <i>Zinc oxide</i>                                              | <i>81.38</i>  | <i>g</i> | <i>market for zinc oxide   zinc oxide   Cutoff, S - GLO</i>                                                                                           |
| <b>Hexamethylenetetramine</b>                                  | <b>140.2</b>  | <b>g</b> |                                                                                                                                                       |
| <i>ammonia, anhydrous, liquid</i>                              | <i>68.14</i>  | <i>g</i> | <i>market for ammonia, anhydrous, liquid   ammonia, anhydrous, liquid   Cutoff, S - RER</i>                                                           |
| <i>formaldehyde</i>                                            | <i>180.2</i>  | <i>g</i> | <i>market for formaldehyde   formaldehyde   Cutoff, S - RER</i>                                                                                       |
| <b>Zinc Acetate Dihydrate</b>                                  | <b>219.5</b>  | <b>g</b> |                                                                                                                                                       |
| <i>acetic acid, without water, in 98% solution state</i>       | <i>120.1</i>  | <i>g</i> | <i>market for acetic acid, without water, in 98% solution state   acetic acid, without water, in 98% solution state   Cutoff, S - GLO</i>             |
| <i>water, deionised</i>                                        | <i>18.02</i>  | <i>g</i> | <i>market for water, deionised   water, deionised   Cutoff, S - Europe without Switzerland</i>                                                        |
| <i>zinc oxide</i>                                              | <i>81.40</i>  | <i>g</i> | <i>market for zinc oxide   zinc oxide   Cutoff, S - GLO</i>                                                                                           |
| <b>Tartaric Acid</b>                                           | <b>150.1</b>  | <b>g</b> |                                                                                                                                                       |
| <i>maleic anhydride</i>                                        | <i>98.06</i>  | <i>g</i> | <i>market for maleic anhydride   maleic anhydride   Cutoff, S - GLO</i>                                                                               |
| <i>hydrogen peroxide, without water, in 50% solution state</i> | <i>34.01</i>  | <i>g</i> | <i>market for hydrogen peroxide, without water, in 50% solution state   hydrogen peroxide, without water, in 50% solution state   Cutoff, S - RER</i> |
| <i>water, deionised</i>                                        | <i>18.02</i>  | <i>g</i> | <i>market for water, deionised   water, deionised   Cutoff, S - Europe without Switzerland</i>                                                        |
| <b>Sodium tartrate dibasic dihydrate</b>                       | <b>230.08</b> | <b>g</b> |                                                                                                                                                       |
| <i>sodium hydroxide, without water, in 50% solution state</i>  | <i>80.00</i>  | <i>g</i> | <i>market for sodium hydroxide, without water, in 50% solution state   sodium hydroxide, without water, in 50% solution state   Cutoff, S - RER</i>   |
| <i>tartaric acid</i>                                           | <i>150.12</i> | <i>g</i> | <i>Shown above</i>                                                                                                                                    |
